# Supplementary material for: Zinc oxide synthesis via a microemulsion technique: morphology control with application to dye-sensitized solar cells
Source: Royal Society of Chemistry journal article supplement (doi:10.1039/c1jm15227k), 2011-12-03
Supplement: c1jm15227k.pdf [file c1jm15227k.pdf]

## Electronic Supplementary Information

# Zinc Oxide Synthesis Via Microemulsions Technique: Morphology Control with Application to Dye-Sensitized Solar Cells

Jen-Chieh Lin,<sup>\*a</sup> Chuan-Pei Lee<sup>b</sup> and Kuo-Chuan Ho<sup>\*b,c</sup>

<sup>a</sup>Corning Research Center Taiwan, Room 829, Bldg.53, No195, Sec.4, Chung-Hsin Rd., Chutung, Hsinchu 310, Taiwan

<sup>b</sup>No. 1, Sec. 4, Roosevelt Road, Department of Chemical Engineering, National Taiwan University, Taipei 10617, Taiwan

<sup>c</sup>No. 1, Sec. 4, Roosevelt Road, Institute of Polymer Science and Engineering, National Taiwan University, Taipei 10617, Taiwan

## 1. Phase diagrams constructed using surfactant Triton<sup>®</sup> X-100

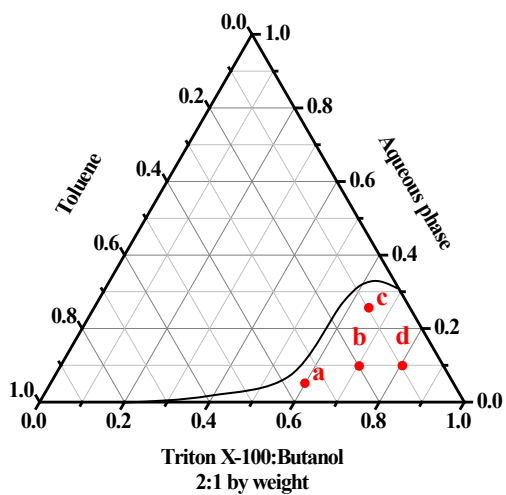

## 2. Phase diagrams constructed using surfactant AOT

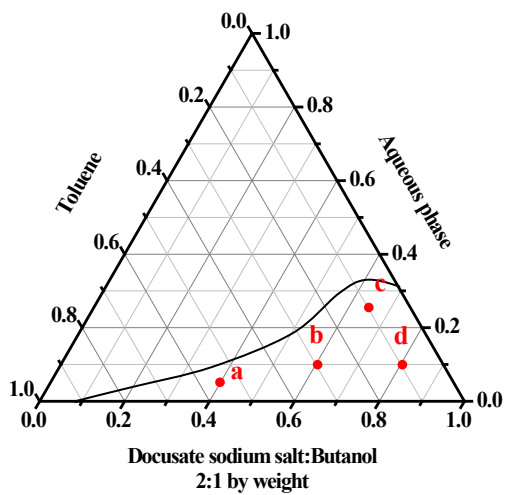

### 3. Experimental Procedures for fabrication of dye-sensitized solar cells

Commercial colloidal ZnO powder (4.23 g, Degussa VP AdNano<sup>®</sup>ZnO20) with an approximate nanoparticle size of 20 nm was thoroughly mixed with 20 ml solution of EtOH and DI-water (v/v=70/30). This colloidal solution was stirred for 3 days to obtain a well-dispersed suspension of 20 wt% ZnO; this paste was used for constructing 15  $\mu\text{m}$  ZnO film on cleaned fluorine-doped SnO<sub>2</sub> conducting glasses (FTO, 7  $\Omega$  sq.<sup>-1</sup>, transmittance  $\geq$  80%, NSG America, Inc., New Jersey, USA). A portion of 0.4×0.4 cm<sup>2</sup> was selected as the active area by removing the side portions by scrapping. The ZnO film was gradually heated to 450 °C in an oxygen atmosphere, and subsequently sintered at that temperature for 30 min. The coral-like ZnO photoanodes were prepared by the same procedure. After sintering at 450 °C and cooling to 80 °C, the ZnO photoanodes were immersed in a 3×10<sup>-4</sup> M solution of D149 (Mitsubishi, Japan) in ACN and tBA (volume ratio of 1:1), at room temperature for 24 h. The thus prepared ZnO/dye electrode was attached to a platinum-sputtered conducting glass electrode (ITO, 7  $\Omega$  sq.<sup>-1</sup>, Ritek Corporation, Hsinchu, Taiwan). The two electrodes were separated by a 25  $\mu\text{m}$ -thick surlyn<sup>®</sup> (SX1170-25, Solaronix S.A., Aubonne, Switzerland) and sealed by heating. A mixture of 0.1 M lithium iodide (LiI, synthetical grade, Merk), 0.6 M DMPII (Solaronix S.A., Aubonne, Switzerland), 0.05 M iodine (I<sub>2</sub>, synthetical grade, Merk), and 0.5 M 4-tert-butylpyridine (TBP, 96%, Acros) in 3-methoxypropionitrile (MPN, Fluka)/acetonitrile (ACN, 99.99%, Aldrich) (volume ratio of 1:1) was used as the electrolyte. The electrolyte was injected into the gap between the electrodes by capillarity.

### 4. Measurements of dye-sensitized solar cells

Surface of a DSSC was illuminated by a class A quality solar simulator (PEC-L11, AM1.5G, Peccell Technologies, Inc.) and the incident light intensity (100 mW cm<sup>-2</sup>) was calibrated with a standard Si cell (PECSI01, Peccell Technologies, Inc.). Photoelectrochemical characteristics of the DSSCs were recorded with a potentiostat/galvanostat (PGSTAT 30, Autolab, Eco-Chemie, the Netherlands). Electrochemical impedance spectra (EIS) were obtained by the above-mentioned potentiostat/galvanostat equipped with an FRA2 module, under a constant light illumination of 100 mW cm<sup>-2</sup>. The frequency explored was ranged from 10 mHz to 65 kHz. Applied bias voltage was set at the open-circuit voltage of the DSSC between the ITO-Pt counter electrode and the FTO-ZnO-dye working electrode, starting from the short-circuit condition; the corresponding AC amplitude was 10 mV. The impedance spectra were analyzed using an equivalent circuit model. Photovoltage transients of the assembled devices were recorded with a digital oscilloscope (model LT322, LeCroy, USA). Pulsed laser excitation was applied by a frequency-doubled Q-switched Nd:YAG laser (model Quanta-Ray GCR-3-10, Spectra-Physics laser) with a 2 Hz repetition rate at 532 nm, and a 7 ns pulse width at half-height. The average electron lifetime could approximately be estimated by fitting a decay of the open-circuit voltage transient with  $\exp(-t/\tau_{ae})$ , where  $t$  is the time and  $\tau_{ae}$  is an average time constant before recombination.
